# Supplementary material for: Optimizing the Antimicrobial Activity of Sodium Hypochlorite (NaClO) over Exposure Time for the Control of Salmonella spp. In Vitro
Source: MDPI journal article supplement (doi:10.3390/antibiotics13010068), 2024-01-10
Supplement: s1 [file s1]

## Supplementary Material

**Table S1:** Analysis of variance (ANOVA) of *Salmonella* Enteritidis ATCC 13076. This strain was not influenced by exposure time or temperature. NaClO concentration was the only variable significantly affected, with  $p < 0.05$ . Results indicated in red.

**Table S1:** ANOVA; Var.: *Salmonella* Enteritidis; R-sqr=,91688; Adj:,82337 (2\*\*(3) central composite, nc=8 ns=6 n0=2 Pontos=16 (Spreadsheet7) in Workbook1)

3 factors, 1 Blocks, 18 runs, MS Pure error = ,1519485

DV: *Salmonella* Enteritidis ATCC 13076

| Factor          | SS       | df | MS       | F        | <i>p</i> |
|-----------------|----------|----|----------|----------|----------|
| (1) °C (L)      | 0.62571  | 1  | 0.62571  | 4.1179   | 0.13544  |
| °C (Q)          | 0.05686  | 1  | 0.05686  | 0.3742   | 0.583965 |
| (2) NaClO (L)   | 36.38508 | 1  | 36.38508 | 239.4566 | 0.000586 |
| NaClO (Q)       | 6.10283  | 1  | 6.10283  | 40.1638  | 0.007945 |
| (3) Time (L)    | 0.60396  | 1  | 0.60396  | 3.9748   | 0.140182 |
| Time (Q)        | 0.42898  | 1  | 0.42898  | 2.8232   | 0.191504 |
| 1L by 2L        | 0.01417  | 1  | 0.01417  | 0.0933   | 0.780013 |
| 1L by 3L        | 1.19847  | 1  | 1.19847  | 7.8874   | 0.067379 |
| 2L by 3L        | 0.63661  | 1  | 0.63661  | 4.1896   | 0.133166 |
| Lack of fit     | 3.73634  | 5  | 0.74727  | 4.9179   | 0.110064 |
| Pure error      | 0.45585  | 3  | 0.15195  |          |          |
| <b>Total SS</b> | 50.4342  | 17 |          |          |          |

**Table S2:** Analysis of variance (ANOVA) of *Salmonella* Schwarzengrund. This strain was influenced by NaClO concentration and exposure time, presenting  $p < 0.05$ . Results indicated in red.

**Table S2:** ANOVA; Var.: *Salmonella* Schwarzengrund; R-sqr=,92448; Adj:,83952 (2\*\*(3) central composite, nc=8 ns=6 n0=2 Pontos=16 (Spreadsheet7) in Workbook1)

3 factors, 1 Blocks, 18 Runs, MS Pure error = ,4504172

DV: *Salmonella* Schwarzengrund

| Factor        | SS       | df | MS       | F        | <i>p</i> |
|---------------|----------|----|----------|----------|----------|
| (1) °C (L)    | 0.7816   | 1  | 0.7816   | 1.73529  | 0.279313 |
| °C (Q)        | 0.28738  | 1  | 0.28738  | 0.63802  | 0.482817 |
| (2) NaClO (L) | 40.39918 | 1  | 40.39918 | 89.6928  | 0.002496 |
| NaClO (Q)     | 4.13074  | 1  | 4.13074  | 9.17093  | 0.056384 |
| (3) Time (L)  | 5.14897  | 1  | 5.14867  | 11.43089 | 0.043061 |
| Time (Q)      | 1.8899   | 1  | 1.8899   | 4.1959   | 0.13297  |
| 1L by 2L      | 0.0453   | 1  | 0.0453   | 0.10058  | 0.771926 |
| 1L by 3L      | 2.49269  | 1  | 2.49269  | 5.53418  | 0.10008  |
| 2L by 3L      | 0.90071  | 1  | 0.90071  | 1.99973  | 0.252241 |
| Lack of fit   | 3.34443  | 5  | 0.66889  | 1.48504  | 0.395645 |

|                 |          |    |         |
|-----------------|----------|----|---------|
| Pure error      | 1.35125  | 3  | 0.45042 |
| <b>Total SS</b> | 62.17682 | 17 |         |
